# Supplementary material
Source: PubMed Central journal article supplement (PMC2833329)

# Mechanistic Investigation of *N*- Homocysteinylation Mediated Protein-Gold Nanoconjugate Assembly

*Arther T. Gates,<sup>1</sup> Leonard Moore Jr.,<sup>1</sup> Monica R. Sylvain,<sup>1</sup> Christina M. Jones,<sup>2</sup> Mark Lowry,<sup>1</sup> Bilal El- Zahab,<sup>1</sup> James W. Robinson,<sup>1</sup> Robert M. Strongin<sup>3\*</sup> and Isiah M. Warner<sup>1\*</sup>*

<sup>1</sup>Department of Chemistry and <sup>2</sup>College of Basic Sciences, Louisiana State University, Baton Rouge, Louisiana 70803, <sup>3</sup>Department of Chemistry, Portland State University, Portland, Oregon 97207

\*Correspondence to: Isiah M. Warner Department of Chemistry, Louisiana State University, Baton Rouge, Louisiana 70803, USA and Robert M. Strongin, Portland State University, Portland, Oregon 97207

E-mail: Isiah M. Warner, [iwarner@lsu.edu](mailto:iwarner@lsu.edu) and Robert M. Strongin, [strongin@pdx.edu](mailto:strongin@pdx.edu)

Tel: (225) 578-3971

## Supporting Information Table of Contents

| Page | Contents                                                                                                      |
|------|---------------------------------------------------------------------------------------------------------------|
| S-3  | <b>Figure S1: Time-resolved UV-vis absorption data for <i>N</i>-homocysteinylation of Cyt <i>c</i>-PGNs</b>   |
| S-4  | <b>Figure S2: Time-resolved UV-vis absorption data for <i>N</i>-homocysteinylation of HSA- and serum-PGNs</b> |
| S-5  | <b>Figure S3: TEM images of unmodified PGNs</b>                                                               |
| S-6  | <b>Representative DLS data for modified PGNs</b>                                                              |

a)

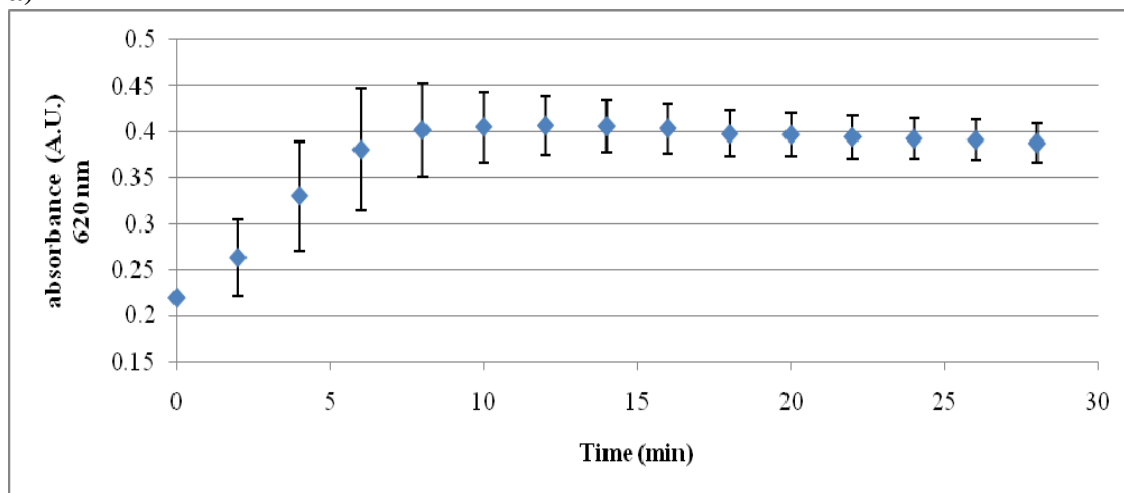

b)

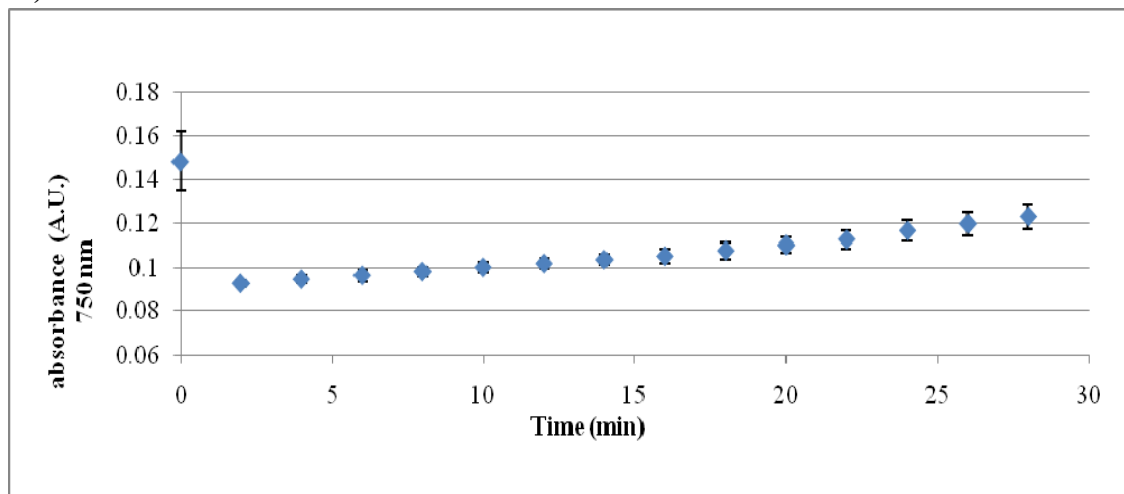

**Figure S1.** UV-vis absorption data acquired at 620 nm (60°C) over a 28 minute time period for *N*-homocysteinylation of a) Cyt c-GNPs. UV-vis absorption data acquired at 750 nm (25°C) over a 28 minute time period for *N*-homocysteinylation of b) Cyt c-GNPs. Each data point represents the average of triplicate measurements.

a)

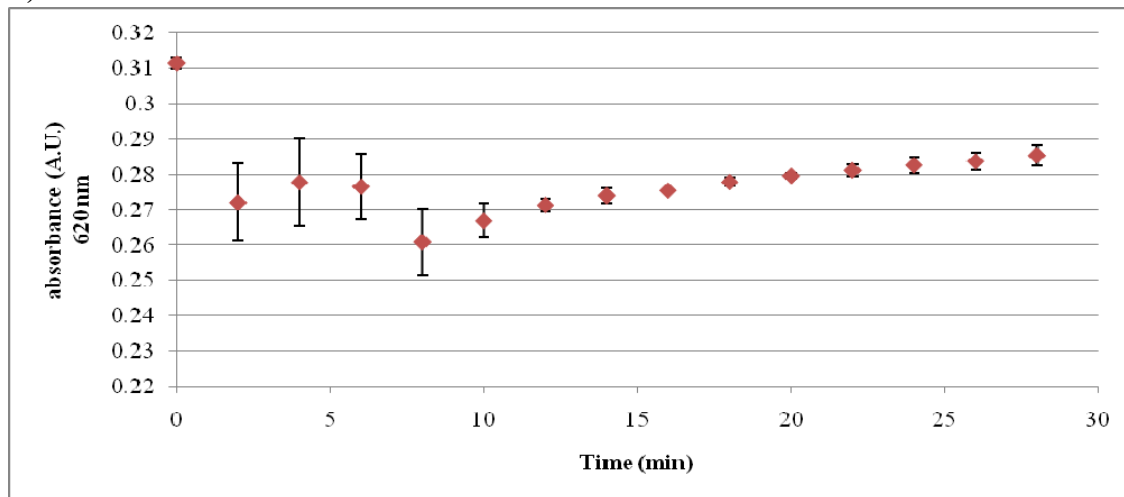

b)

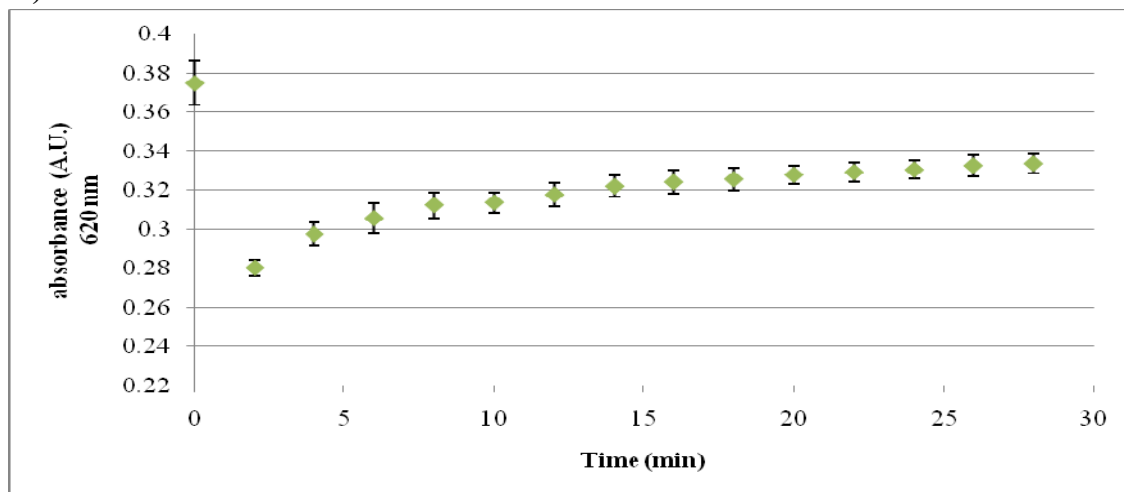

Figure S2. UV-vis absorption data acquired at 620nm (60°C) over a 28 minute time period for *N*-homocysteinylation of a) HSA-GNPs and b) serum-GNPs illustrate the growth of GNP assemblies. Each data point represents the average of triplicate measurements.

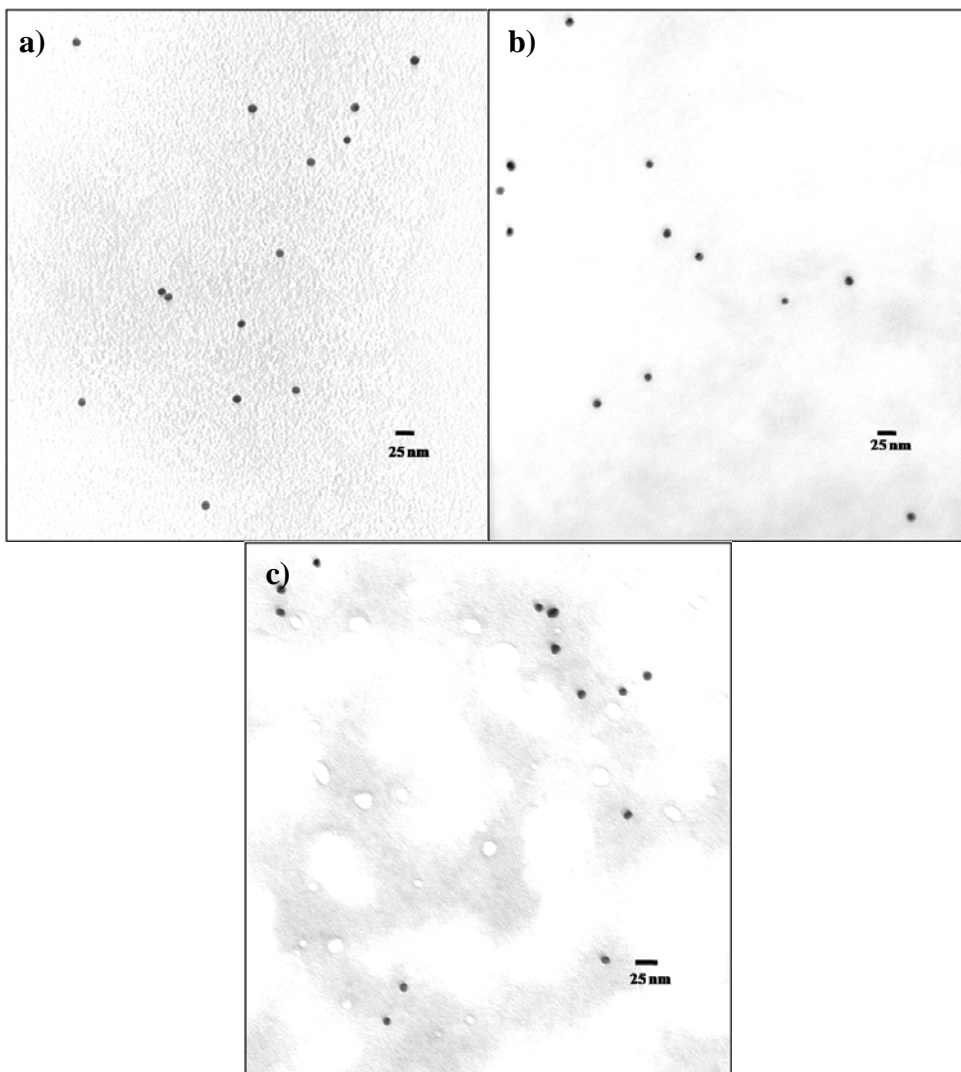

**Figure S3. Representative transmission electron microscopy images of unmodified PGNs. a) Cyt *c*-PGNs, b) HSA-PGNs, and c) serum-GNPs. Note that some PGNs are irregularly shaped due to the protein adlayer. GNP assembly is not indicated by these images.**

| Cyt <i>c</i> -<br>PGN_HTL | Z-    | PdI   | Pk1       | Pk2       | Pk3       | Pk1       | Pk2       | Pk3       |
|---------------------------|-------|-------|-----------|-----------|-----------|-----------|-----------|-----------|
|                           | Ave   |       | Mean      | Mean      | Mean      | Area      | Area      | Area      |
|                           | d.nm  |       | intensity | intensity | intensity | intensity | intensity | intensity |
|                           |       |       | d.nm      | d.nm      | d.nm      | %         | %         | %         |
| 6 min                     | 138.2 | 0.174 | 151       | 4771      | 0         | 97.9      | 2.1       | 0         |
| 15 min                    | 192.2 | 0.078 | 208.2     | 0         | 0         | 100       | 0         | 0         |
| 18 min                    | 230   | 0.163 | 273.8     | 0         | 0         | 100       | 0         | 0         |
| 27 min                    | 247.9 | 0.211 | 256.4     | 0         | 0         | 100       | 0         | 0         |

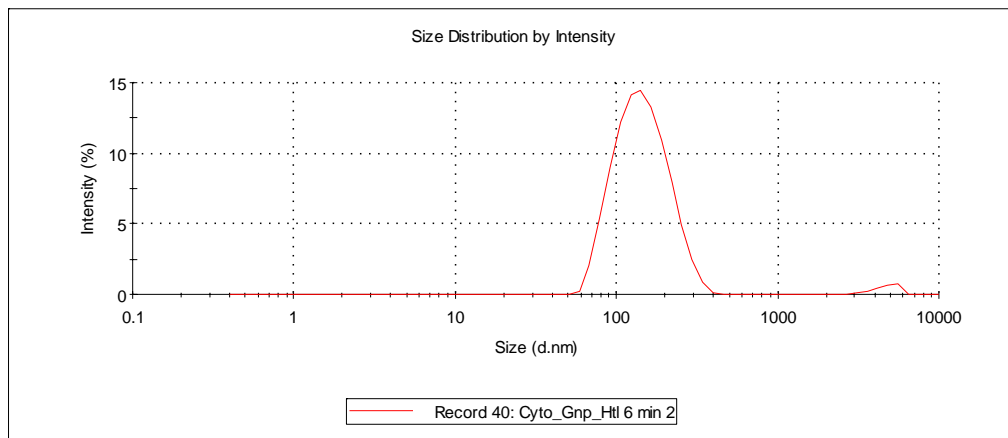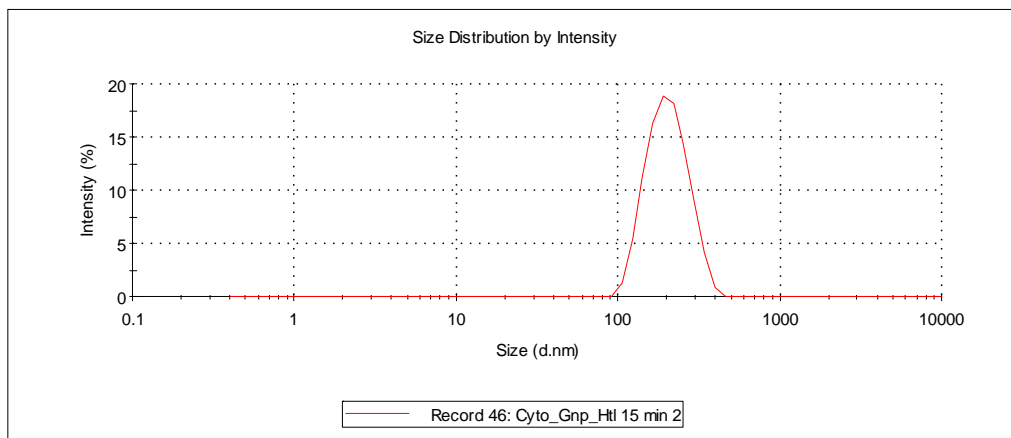

**DLS data for modified Cyt *c*-PGNs contined on next page**

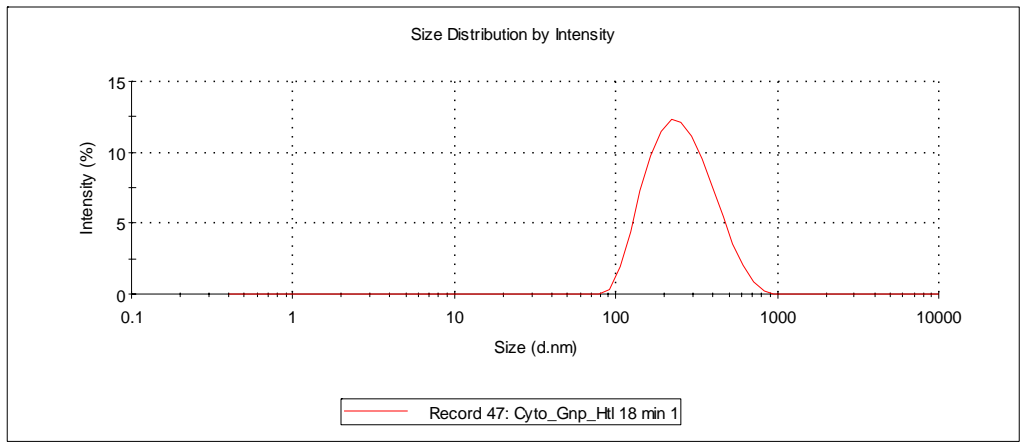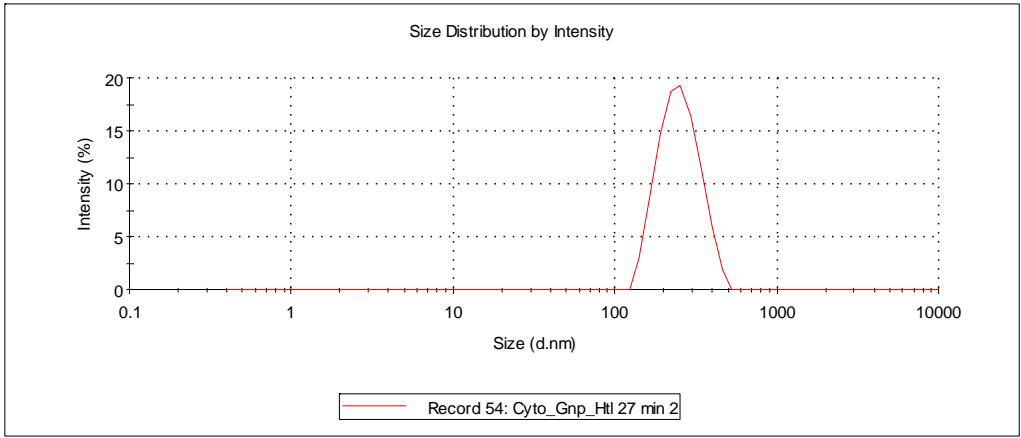

| HSA-<br>PGN_HTL | Z-Ave | PdI   | Pk1   | Pk2  | Pk3  | Pk1 Area  | Pk2 Area  | Pk3 Area  |
|-----------------|-------|-------|-------|------|------|-----------|-----------|-----------|
|                 | d.nm  |       | Mean  | Mean | Mean | intensity | intensity | Intensity |
|                 | d.nm  |       | d.nm  | d.nm | d.nm | %         | %         | %         |
| 5 min           | 30.99 | 0.21  | 35.8  | 5102 | 0    | 98.6      | 1.4       | 0         |
| 10 min          | 41.9  | 0.193 | 52.48 | 0    | 0    | 100       | 0         | 0         |
| 25 min          | 55.71 | 0.212 | 70.65 | 0    | 0    | 100       | 0         | 0         |
| 30 min          | 55.06 | 0.184 | 68.96 | 0    | 0    | 100       | 0         | 0         |

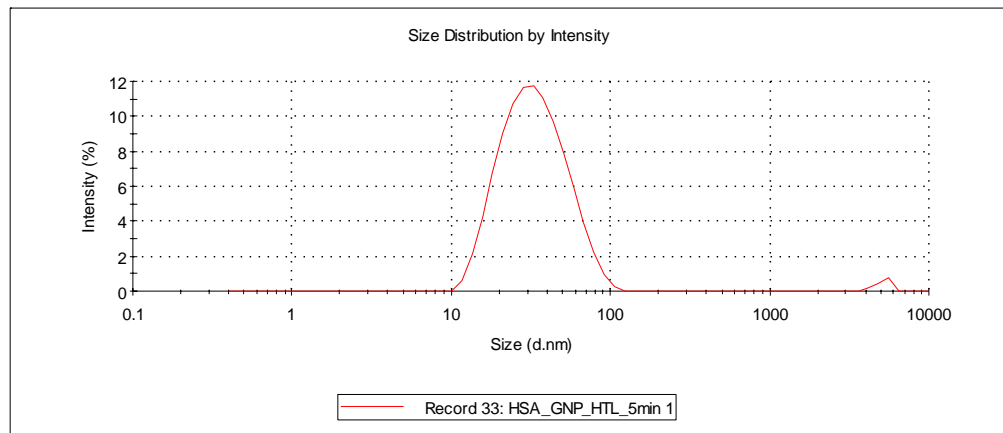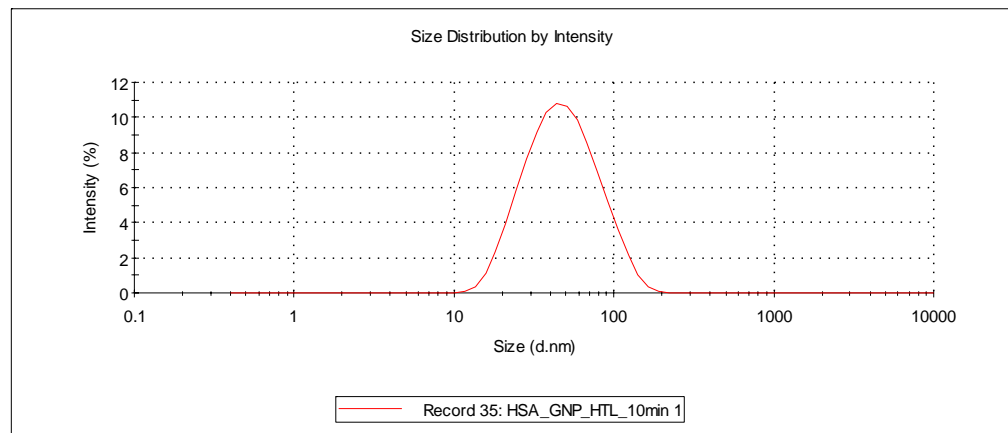

**DLS data for modified HSA-PGNs continued on next page**



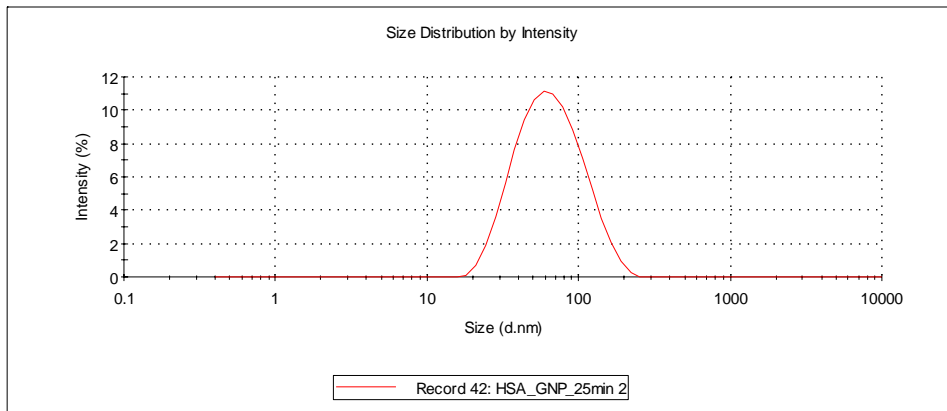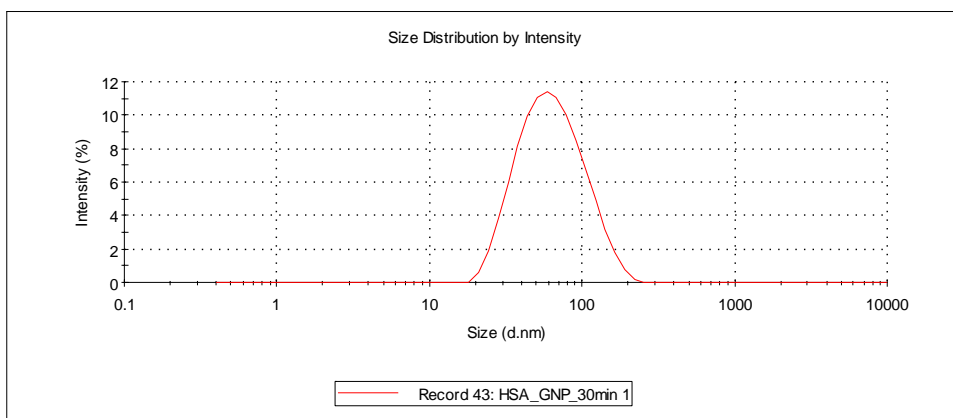

Supplement: NIHMS180041-supplement-SI.pdf [file NIHMS180041-supplement-SI.pdf]
